# Supplementary material for: Screening the Impact of Surfactants and Reaction Conditions on the De-Inkability of Different Printing Ink Systems for Plastic Packaging
Source: MDPI journal article supplement (doi:10.3390/polym15092220), 2023-05-08
Supplement: s1 [file s1]

# Screening the De-inkability of Different Surface Printing Ink Systems for Plastic Packaging with Surfactants

Supplement Material S1

## 1 Structure of the printing binder used in the study

### 1.1 Nitrocellulose NC

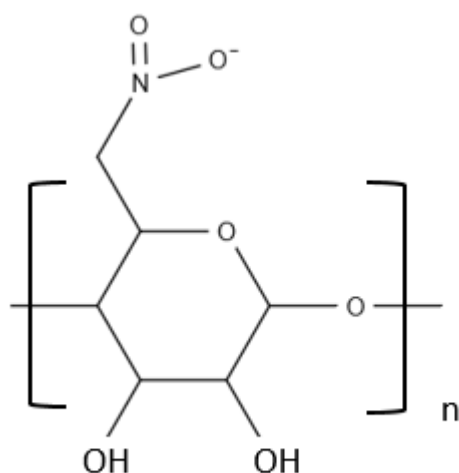

### 1.2 Polyvinyl butyral (PVB)

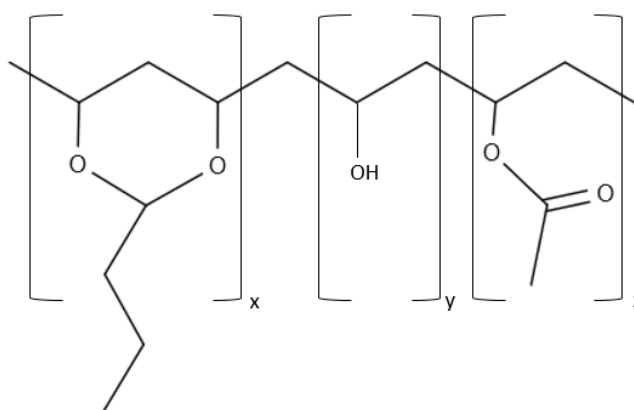

### 1.3 Cellulose acetate propionate (CAP)

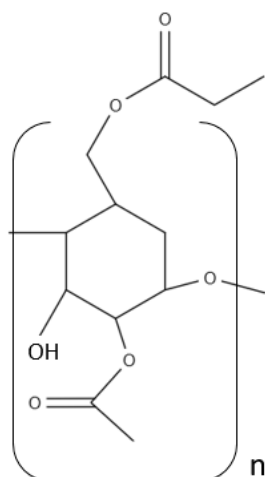

### 1.4 Polyurethane (PU)

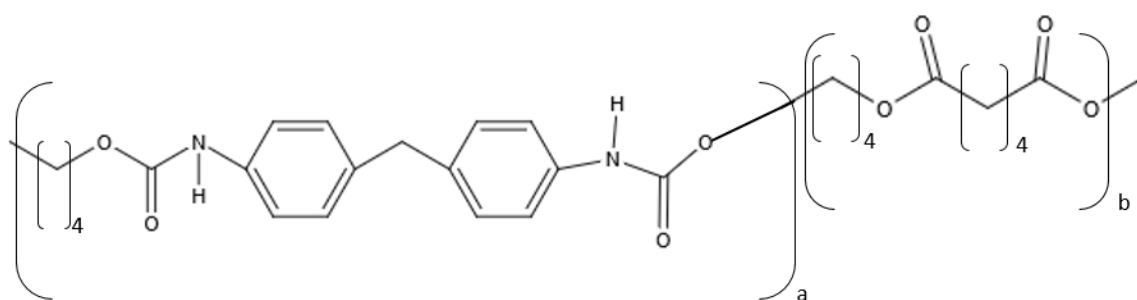

### 1.5 UV-crosslinked trimethylolpropane triacrylate

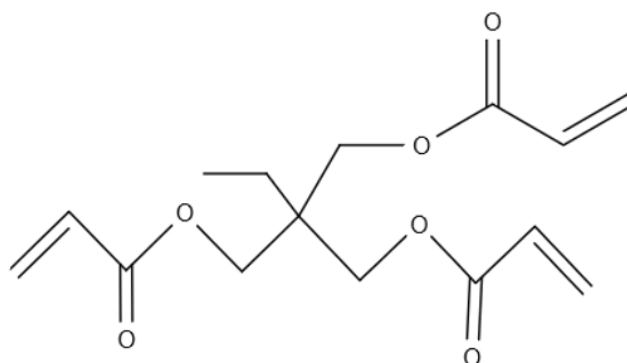

## 2 Pigment used in the printing inks in this study

| Pigment Name | CAS Number |
|--------------|------------|
| PR 57:1      | 5281-04-9  |
| PR 146       | 5280-68-2  |

|         |           |
|---------|-----------|
| PY 13   | 5102-83-0 |
| PBk 7   | 1333-86-4 |
| PB 15:4 | 147-14-8  |

### 3 Surfactants used for the de-inking experiment in this study

| Commercial name or abbreviation | Full name                                                                    | CAS number  |
|---------------------------------|------------------------------------------------------------------------------|-------------|
| CTAC                            | Cetrimonium chloride                                                         | 112-02-7    |
| W111                            | Oxirane, methyl-, polymer with 151 oxirane, mono(3,5,5-trimethylhexyl) ether | 204336-40-3 |
| CTAB                            | Cetrimonium bromide                                                          | 57-09-0     |
| Triton X100                     | Octoxinol 9                                                                  | 9002-93-1   |

## Supplement Material S2:

### Program code for color measurement

```
import gradio as gr
import numpy as np
# from matplotlib import pyplot as plt
from skimage import color

# def lab_preview(img_lab):
#     # scale
#     img_lab_scaled = (img_lab + [0, 128, 128]) / [100, 255, 255]
#     # plot
#     fig = plt.figure()
#     plt.subplots_adjust(hspace=0.25)
#     plt.subplot(221)
#     plt.imshow(img_lab_scaled)
#     plt.title('Lab scaled')
#     plt.subplot(222)
#     plt.imshow(img_lab_scaled[:, :, 0], cmap="gray")
#     plt.axis('off')
#     plt.title('L channel')
#     plt.subplot(223)
#     plt.imshow(img_lab_scaled[:, :, 1], cmap='RdYlGn_r')
#     plt.axis('off')
#     plt.title('a')
#     plt.subplot(224)
#     plt.imshow(img_lab_scaled[:, :, 2], cmap='YlGnBu_r')
#     plt.axis('off')
#     plt.title('b')
#     # convert plot to image using buffer
#     fig.canvas.draw()
#
```

```

# # Now we can save it to a numpy array.

# data = np.frombuffer(fig.canvas.tostring_rgb(), dtype=np.uint8)
# data = data.reshape(fig.canvas.get_width_height()[::-1] + (3,))
# return data

```

```

def lab_mean(img_lab):
    return (
        np.mean(img_lab[:, :, 0]),
        np.mean(img_lab[:, :, 1]),
        np.mean(img_lab[:, :, 2])
    )

```

```

def process_lab(img):
    img_lab = color.rgb2lab(img)
    # img_pre = lab_preview(img_lab)
    l, a, b = lab_mean(img_lab)
    return l, a, b

```

```

demo = gr.Interface(
    fn=process_lab,
    inputs=gr.Image(),
    outputs=[
        gr.Number(label="L-mean"),
        gr.Number(label="a-mean"),
        gr.Number(label="b-mean"),
        # gr.Image(type="pil"),
    ]
)

```

```
if __name__ == "__main__":  
    demo.launch()
```
